# Supplementary material
Source: PubMed Central journal article supplement (PMC1567708)
Supplement: pnas_0604911103_1.pdf [file pnas_0604911103_1.pdf]

**Table 2. Cellular composition of rodent brains**

| Species         | <i>n</i> | M, g           | M <sub>BR</sub> , % | N <sub>c</sub>                    | D <sub>c</sub>                    | N <sub>c</sub> BR, % | N <sub>n</sub> , % | N <sub>n</sub>                   | D <sub>n</sub>                    | N <sub>n</sub> BR, % | N <sub>nn</sub>                   | D <sub>nn</sub>                  | NnnBR, %   |
|-----------------|----------|----------------|---------------------|-----------------------------------|-----------------------------------|----------------------|--------------------|----------------------------------|-----------------------------------|----------------------|-----------------------------------|----------------------------------|------------|
| Cortex          |          |                |                     |                                   |                                   |                      |                    |                                  |                                   |                      |                                   |                                  |            |
| Mouse           | 4        | 0.173 ± 0.015  | 41.7 ± 2.8          | 25.75 ± 5.65 × 10 <sup>6</sup>    | 147.32 ± 20.98 × 10 <sup>3</sup>  | 23.9 ± 5.2           | 53.8 ± 4.9         | 13.69 ± 2.24 × 10 <sup>6</sup>   | 78.67 ± 7.68 × 10 <sup>3</sup>    | 19.6 ± 4.1           | 12.06 ± 3.67 × 10 <sup>6</sup>    | 68.64 ± 15.81 × 10 <sup>3</sup>  | 31.8 ± 7.2 |
| Hamster         | 2        | 0.446 ± 0.048  | 43.8 ± 1.6          | 59.02 ± 2.27 × 10 <sup>6</sup>    | 133.37 ± 19.47 × 10 <sup>3</sup>  | 36.0 ± 6.5           | 29.0 ± 5.0         | 17.4 ± 3.62 × 10 <sup>6</sup>    | 39.10 ± 12.33 × 10 <sup>3</sup>   | 19.4 ± 6.1           | 41.87 ± 1.35 × 10 <sup>6</sup>    | 94.27 ± 7.14 × 10 <sup>3</sup>   | 55.8 ± 8.6 |
| Rat             | 4        | 0.770 ± 0.113  | 42.9 ± 1.7          | 70.71 ± 3.02 × 10 <sup>6</sup>    | 101.52 ± 17.40 × 10 <sup>3</sup>  | 23.1 ± 1.2           | 40.6 ± 5.3         | 31.02 ± 3.03 × 10 <sup>6</sup>   | 41.09 ± 8.00 × 10 <sup>3</sup>    | 15.5 ± 0.9           | 45.69 ± 5.68 × 10 <sup>6</sup>    | 60.43 ± 12.48 × 10 <sup>3</sup>  | 34.6 ± 2.8 |
| Guinea pig      | 2        | 1.938 ± 0.231  | 51.6 ± 0.7          | 152.13 ± 15.95 × 10 <sup>6</sup>  | 78.54 ± 1.14 × 10 <sup>3</sup>    | 31.8 ± 2.6           | 28.6 ± 1.0         | 43.51 ± 3.17 × 10 <sup>6</sup>   | 22.51 ± 1.05 × 10 <sup>3</sup>    | 18.2 ± 1.5           | 108.61 ± 12.78 × 10 <sup>6</sup>  | 56.04 ± 0.09 × 10 <sup>3</sup>   | 45.5 ± 2.8 |
| Agouti          | 3        | 8.913 ± 1.214  | 48.4 ± 1.3          | 563.39 ± 16.56 × 10 <sup>6</sup>  | 60.85 ± 7.58 × 10 <sup>3</sup>    | 27.2 ± 1.0           | 21.0 ± 0.3         | 112.64 ± 3.92 × 10 <sup>6</sup>  | 12.77 ± 1.43 × 10 <sup>3</sup>    | 13.1*                | 423.74 ± 13.07 × 10 <sup>6</sup>  | 48.09 ± 6.15 × 10 <sup>3</sup>   | 40.0*      |
| Capybara        | 2        | 48.175 ± 2.714 | 63.3 ± 0.4          | 2.15 ± 0.58 × 10 <sup>9</sup>     | 44.45 ± 9.43 × 10 <sup>3</sup>    | 44.0 ± 2.0           | 14.4 ± 1.0         | 306.30 ± 62.73 × 10 <sup>6</sup> | 6.34 ± 0.94 × 10 <sup>3</sup>     | 19.1 ± 3.0           | 1.85 ± 0.51 × 10 <sup>9</sup>     | 38.12 ± 8.49 × 10 <sup>3</sup>   | 56.8 ± 1.7 |
| Cerebellum      |          |                |                     |                                   |                                   |                      |                    |                                  |                                   |                      |                                   |                                  |            |
| Mouse           | 4        | 0.056 ± 0.005  | 13.5 ± 0.8          | 49.17 ± 10.63 × 10 <sup>6</sup>   | 870.18 ± 151.41 × 10 <sup>3</sup> | 44.9 ± 4.3           | 85.8 ± 1.2         | 42.22 ± 9.28 × 10 <sup>6</sup>   | 746.69 ± 128.54 × 10 <sup>3</sup> | 59.0 ± 5.0           | 6.95 ± 1.50 × 10 <sup>6</sup>     | 123.49 ± 25.72 × 10 <sup>3</sup> | 18.4 ± 3.0 |
| Hamster         | 2        | 0.145 ± 0.030  | 14.1 ± 0.9          | 68.65 ± 14.06 × 10 <sup>6</sup>   | 475.33 ± 2.69 × 10 <sup>3</sup>   | 41.1 ± 2.6           | 89.2 ± .2          | 61.21 ± 12.35 × 10 <sup>6</sup>  | 424.00 ± 3.74 × 10 <sup>3</sup>   | 67.7 ± 6.5           | 7.43 ± 1.71 × 10 <sup>6</sup>     | 51.33 ± 1.05 × 10 <sup>3</sup>   | 9.7 ± 0.4  |
| Rat             | 4        | 0.272 ± 0.038  | 15.2 ± 1.0          | 168.18 ± 12.57 × 10 <sup>6</sup>  | 631.24 ± 128.58 × 10 <sup>3</sup> | 50.7 ± 3.2           | 82.8 ± 3.2         | 139.17 ± 11.19 × 10 <sup>6</sup> | 522.69 ± 108.85 × 10 <sup>3</sup> | 69.6 ± 4.4           | 29.01 ± 6.28 × 10 <sup>6</sup>    | 108.56 ± 29.35 × 10 <sup>3</sup> | 21.9 ± 3.8 |
| Guinea pig      | 2        | 0.500 ± 0.077  | 13.3 ± 0.3          | 204.15 ± 6.68 × 10 <sup>6</sup>   | 412.58 ± 50.28 × 10 <sup>3</sup>  | 42.7 ± 0.4           | 82.2 ± 1.6         | 167.85 ± 2.18 × 10 <sup>6</sup>  | 339.75 ± 48.07 × 10 <sup>3</sup>  | 70.1 ± 1.7           | 36.29 ± 4.51 × 10 <sup>6</sup>    | 72.82 ± 2.22 × 10 <sup>3</sup>   | 15.2 ± 1.0 |
| Agouti          | 3        | 2.742 ± 0.196  | 15.0 ± 0.6          | 831.18 ± 11.13 × 10 <sup>6</sup>  | 304.30 ± 25.58 × 10 <sup>3</sup>  | 42.7 ± 0.7           | 81.6 ± 3.2         | 678.79 ± 35.26 × 10 <sup>6</sup> | 248.82 ± 28.91 × 10 <sup>3</sup>  | 74.6*                | 152.40 ± 24.13 × 10 <sup>6</sup>  | 55.48 ± 6.75 × 10 <sup>3</sup>   | 17.3*      |
| Capybara        | 2        | 6.632 ± 1.312  | 8.7 ± 1.3           | 1.73 ± 0.09 × 10 <sup>9</sup>     | 264.56 ± 39.29 × 10 <sup>3</sup>  | 36.2 ± 6.3           | 67.0 ± 3.0         | 1.16 ± 0.05 × 10 <sup>9</sup>    | 177.98 ± 34.39 × 10 <sup>3</sup>  | 72.4 ± 3.3           | 570.94 ± 81.11 × 10 <sup>6</sup>  | 86.57 ± 4.90 × 10 <sup>3</sup>   | 18.0 ± 3.0 |
| Remaining areas |          |                |                     |                                   |                                   |                      |                    |                                  |                                   |                      |                                   |                                  |            |
| Mouse           | 4        | 0.186 ± 0.019  | 44.8 ± 2.8          | 33.78 ± 4.62 × 10 <sup>6</sup>    | 180.96 ± 10.24 × 10 <sup>3</sup>  | 31.2 ± 1.8           | 44.6 ± 4.0         | 14.99 ± 1.58 × 10 <sup>6</sup>   | 80.67 ± 6.62 × 10 <sup>3</sup>    | 21.3 ± 2.4           | 18.79 ± 3.59 × 10 <sup>6</sup>    | 100.30 ± 11.25 × 10 <sup>3</sup> | 21.3 ± 2.4 |
| Hamster         | 2        | 0.429 ± 0.069  | 42.1 ± 0.7          | 38.46 ± 11.97 × 10 <sup>6</sup>   | 88.44 ± 13.75 × 10 <sup>3</sup>   | 22.9 ± 3.9           | 31.4 ± 7.6         | 11.61 ± 0.81 × 10 <sup>6</sup>   | 27.24 ± 2.45 × 10 <sup>3</sup>    | 12.9 ± 0.5           | 26.84 ± 11.16 × 10 <sup>6</sup>   | 61.20 ± 16.20 × 10 <sup>3</sup>  | 12.9 ± 0.5 |
| Rat             | 4        | 0.761 ± 0.171  | 42.0 ± 2.5          | 86.77 ± 12.25 × 10 <sup>6</sup>   | 116.91 ± 21.99 × 10 <sup>3</sup>  | 26.2 ± 3.7           | 34.2 ± 4.0         | 29.94 ± 7.27 × 10 <sup>6</sup>   | 39.64 ± 6.48 × 10 <sup>3</sup>    | 15.0 ± 3.6           | 56.83 ± 5.84 × 10 <sup>6</sup>    | 77.27 ± 17.09 × 10 <sup>3</sup>  | 15.0 ± 3.6 |
| Guinea pig      | 2        | 1.321 ± 0.191  | 35.1 ± 0.4          | 121.60 ± 12.06 × 10 <sup>6</sup>  | 93.69 ± 22.67 × 10 <sup>3</sup>   | 25.5 ± 3.1           | 23.0 ± 4.4         | 28.26 ± 8.14 × 10 <sup>6</sup>   | 22.07 ± 9.35 × 10 <sup>3</sup>    | 11.8 ± 3.2           | 93.34 ± 3.92 × 10 <sup>6</sup>    | 71.62 ± 13.32 × 10 <sup>3</sup>  | 11.8 ± 3.2 |
| Agouti          | 3        | 6.710 ± 0.670  | 36.6 ± 0.8          | 585.14 ± 52.27 × 10 <sup>6</sup>  | 90.88 ± 19.67 × 10 <sup>3</sup>   | 30.1 ± 1.7           | 19.1*              | 104.83*                          | 14.72* × 10 <sup>3</sup>          | 12.2*                | 443.35*                           | 62.25* × 10 <sup>3</sup>         | 12.2*      |
| Capybara        | 2        | 21.229 ± 0.239 | 28.0 ± 1.7          | 983.37 ± 419.02 × 10 <sup>6</sup> | 46.44 ± 20.26 × 10 <sup>3</sup>   | 19.7 ± 4.2           | 15.0 ± 5.1         | 136.81 ± 12.92 × 10 <sup>6</sup> | 6.45 ± 0.68 × 10 <sup>3</sup>     | 8.5 ± 0.4            | 846.56 ± 406.10 × 10 <sup>6</sup> | 39.99 ± 19.58 × 10 <sup>3</sup>  | 8.5 ± 0.4  |

| Total      |   |                |  |                                  |                                  |  |            |                                  |                                  |  |                                  |                                 |  |
|------------|---|----------------|--|----------------------------------|----------------------------------|--|------------|----------------------------------|----------------------------------|--|----------------------------------|---------------------------------|--|
| Mouse      | 4 | 0.416 ± 0.028  |  | 108.69 ± 16.25 × 10 <sup>6</sup> | 256.39 ± 32.08 × 10 <sup>3</sup> |  | 65.3 ± 2.3 | 70.89 ± 10.41 × 10 <sup>6</sup>  | 167.15 ± 19.42 × 10 <sup>3</sup> |  | 37.80 ± 6.66 × 10 <sup>6</sup>   | 90.41 ± 10.14 × 10 <sup>3</sup> |  |
| Hamster    | 2 | 1.020 ± 0.147  |  | 166.12 ± 23.77 × 10 <sup>6</sup> | 164.65 ± 2.33 × 10 <sup>3</sup>  |  | 54.3 ± 2.0 | 89.97 ± 9.55 × 10 <sup>6</sup>   | 89.39 ± 2.07 × 10 <sup>3</sup>   |  | 76.15 ± 14.22 × 10 <sup>6</sup>  | 74.42 ± 3.21 × 10 <sup>3</sup>  |  |
| Rat        | 4 | 1.802 ± 0.313  |  | 331.65 ± 8.84 × 10 <sup>6</sup>  | 188.79 ± 36.65 × 10 <sup>3</sup> |  | 60.3 ± 2.3 | 200.13 ± 12.17 × 10 <sup>6</sup> | 113.98 ± 23.16 × 10 <sup>3</sup> |  | 131.52 ± 6.11 × 10 <sup>6</sup>  | 74.82 ± 14.62 × 10 <sup>3</sup> |  |
| Guinea pig | 2 | 3.759 ± 0.499  |  | 477.87 ± 10.57 × 10 <sup>6</sup> | 128.15 ± 16.40 × 10 <sup>3</sup> |  | 50.2 ± 1.7 | 239.62 ± 2.79 × 10 <sup>6</sup>  | 64.42 ± 10.40 × 10 <sup>3</sup>  |  | 238.24 ± 13.36 × 10 <sup>6</sup> | 63.70 ± 4.91 × 10 <sup>3</sup>  |  |
| Agouti     | 3 | 18.365 ± 2.061 |  | 1.94 ± 0.06 × 10 <sup>9</sup>    | 111.29 ± 18.24 × 10 <sup>3</sup> |  | 45.2*      | 856.74 × 10 <sup>6</sup> *       | 44.49 × 10 <sup>3</sup> *        |  | 1.04 × 10 <sup>9</sup> *         | 53.91 × 10 <sup>3</sup> *       |  |
| Capybara   | 2 | 76.036 ± 3.787 |  | 4.87 ± 1.08 × 10 <sup>9</sup>    | 62.12 ± 10.40 × 10 <sup>3</sup>  |  | 33.5 ± 5.8 | 1.60 ± 0.08 × 10 <sup>9</sup>    | 20.54 ± 0.10 × 10 <sup>3</sup>   |  | 3.27 ± 1.00 × 10 <sup>9</sup>    | 42.67 ± 11.02 × 10 <sup>3</sup> |  |

All values are given as mean ± SD. *n*, number of individuals analyzed; M, mass of structure (in g); M<sub>BR</sub>, %, percentage of total brain mass contained in structure; N<sub>c</sub>, number of cells in structure; D<sub>c</sub>, density of cells per mg of tissue in structure; N<sub>cBR</sub>, %, percentage of total brain cells contained in structure; N<sub>n</sub>, %, percentage of cells in the structure that are neurons; N<sub>n</sub>, number of neurons in structure; D<sub>n</sub>, density of neurons per mg of tissue in structure; N<sub>nBR</sub> %, percentage of total brain neurons contained in structure; N<sub>nn</sub>, number of nonneuronal cells in structure; D<sub>nn</sub>, density of non-neuronal cells per mg of tissue in structure; N<sub>nnBR</sub>, %, percentage of total brain nonneuronal cells contained in structure.
